# Supplementary material
Source: publisher figshare collection journal article supplement (https://acs.figshare.com/ndownloader/files/3954004)
Supplement: Supplementary file 1 [file 3954004]

## Supporting Information

### Assembly of Debranched Xylan from Solution and on Nanocellulosic Surfaces

*Toon J. Bosmans, Agnes M. Stepan, Guillermo Toriz, Scott Renneckar, Erdem Karabulut, Lars Wågberg, and Paul Gatenholm*

#### Calculation of the surface coverage of the original and debranched xylan

1. Original xylan;  $M_w = 45000$ , Solid adsorbed mass is  $0.48 \text{ mg/m}^2$ , diameter of the molecule is  $42 \text{ nm}$

$$\text{Surface coverage} = \frac{\pi(42 \cdot 10^{-9})^2}{4} \cdot \frac{0.48 \cdot 10^{-3}}{45000} \cdot 6.023 \cdot 10^{23} = 8.9 \text{ m}^2/\text{m}^2$$

2. Debranched, aggregated xylan; A different route has to be adopted where the size of the aggregates and the adsorbed amount is taken as base for the estimates. Diameter of the particles;  $310 \text{ nm}$ , density of the particles  $1000 \text{ kg/m}^3$ , assume a spherical close-packing which will give a solids volume of  $50 \%$ . Original adsorbed amount from QCM=  $5.5 \text{ mg/m}^2$  which yields a solid adsorbed amount of  $2.75 \text{ mg/m}^2$ .

First calculate the number,  $n$ , of adsorbed xylan particles

$$\text{Adsorbed amount} = \frac{n \cdot 4\pi(155 \cdot 10^{-9})^3}{3} 1000 = 2.75 \cdot 10^{-6}; n = 1.8 \cdot 10^{11}/\text{m}^2$$

$$\text{Surface coverage} = 1.8 \cdot 10^{11} \cdot \frac{\pi \cdot (310 \cdot 10^{-9})^2}{4} = 1.8 \cdot 10^{-2} \text{ m}^2/\text{m}^2$$
